# Supplementary material
Source: HighWire-hosted journal article supplement (https://bmjopen.bmj.com/content/10/11/e037580)
Supplement: inline-supplementary-material-1 [file inline-supplementary-material-1.pdf]

## Supplementary File 1: Sampling of the study participants in the ICDM pilot facilities

| Health facilities | Number of patients recorded in the clinic appointment roaster in July 2013. |      |    |       | *Step 1 sampling: proportionate sampling from the health facilities | **Step 2 sampling: stratified sampling by chronic disease status |     |    |
|-------------------|-----------------------------------------------------------------------------|------|----|-------|---------------------------------------------------------------------|------------------------------------------------------------------|-----|----|
|                   | ART                                                                         | HPT  | DM | Total |                                                                     | ART                                                              | HPT | DM |
| <b>A</b>          | 724                                                                         | 642  | -  | 1366  | 165                                                                 | 88                                                               | 77  | 0  |
| <b>B</b>          | 146                                                                         | 715  | -  | 861   | 104                                                                 | 18                                                               | 86  | 0  |
| <b>C</b>          | 41                                                                          | 325  | 7  | 373   | 45                                                                  | 5                                                                | 39  | 1  |
| <b>D</b>          | 84                                                                          | 274  | 6  | 364   | 44                                                                  | 10                                                               | 33  | 1  |
| <b>E</b>          | 66                                                                          | 50   | -  | 116   | 14                                                                  | 8                                                                | 6   | 0  |
| <b>F</b>          | 50                                                                          | 215  | -  | 265   | 32                                                                  | 6                                                                | 26  | 0  |
| <b>G</b>          | 49                                                                          | 208  | -  | 257   | 31                                                                  | 6                                                                | 25  | 0  |
| <b>Total</b>      | 1160                                                                        | 2429 | 13 | 3602  | 435                                                                 | 141                                                              | 292 | 2  |

*#ART, HPT and DM = HIV/AIDS, hypertension and diabetes mellitus patients, respectively.*

**\*Step 1: proportionate sampling for each health facility was achieved by multiplying the sampling fraction by the total number of patients in each health facility**

Sampling fraction =  $435/3602 = 0.1207$

Where 435 = calculated study sample size and 3602 = total sampling frame

Example of proportionate sampling for clinic A:  $0.1207 \times 1366 = 165$ , where 1366 is the total number of patients in health facility A.

**\*\*Step 2: stratified sampling in each health facility**

Example of stratified sampling in health facility A

53% (724/1366) and 47% (642/1366) of the total number of patients in health facility A were HIV and hypertension patients, respectively. Of the 165 patients recruited in health facility A, 53% (n=88) were HIV patients and 47% (n=77) were hypertension patients.

## Sampling of patients in the comparison facilities

| Health facilities | Number of patients recorded in the clinic appointment roaster in July 2013. |      |    |       | *Step 1 sampling: proportionate sampling from the health facilities | **Step 2 sampling: stratified sampling by chronic disease status |     |    |
|-------------------|-----------------------------------------------------------------------------|------|----|-------|---------------------------------------------------------------------|------------------------------------------------------------------|-----|----|
|                   | ART                                                                         | HPT  | DM | Total |                                                                     | ART                                                              | HPT | DM |
| <b>A</b>          | 365                                                                         | 115  | -  | 480   | 58                                                                  | 44                                                               | 14  | 0  |
| <b>B</b>          | 231                                                                         | 175  | -  | 406   | 49                                                                  | 28                                                               | 21  | 0  |
| <b>C</b>          | 107                                                                         | 125  | -  | 232   | 28                                                                  | 13                                                               | 15  | 0  |
| <b>D</b>          | 233                                                                         | 156  | -  | 389   | 47                                                                  | 28                                                               | 19  | 0  |
| <b>E</b>          | 1426                                                                        | 713  | 22 | 2161  | 261                                                                 | 173                                                              | 86  | 2  |
| <b>Total</b>      | 2362                                                                        | 1284 | 22 | 3668  | 443                                                                 | 286                                                              | 155 | 2  |

*#ART, HPT and DM = HIV/AIDS, hypertension and diabetes mellitus patients, respectively.*

**\*Step 1: proportionate sampling for each health facility was achieved by multiplying the sampling fraction by the total number of patients in each health facility**

Sampling fraction =  $443/3668 = 0.121$

Where 435 = calculated study sample size and 3668 = total sampling frame

Example of proportionate sampling for clinic A:  $0.121 \times 480 = 58$ , where 480 is the total number of patients in health facility A.

**\*\*Step 2: stratified sampling in each health facility**

Example of stratified sampling in health facility A

76% (365/480) and 24% (115/480) of the total number of patients in health facility A were HIV and hypertension patients, respectively. Of the 58 patients recruited in health facility A, 76% (n=44) were HIV patients and 24% (n=14) were hypertension patients.
