# Supplementary material
Source: HighWire-hosted journal article supplement (https://bmjopen.bmj.com/content/10/11/e037580)
Supplement: inline-supplementary-material-2 [file inline-supplementary-material-2.pdf]

## Supplementary File 2: Antiretroviral and antihypertensive drugs used in the study setting

| <b>ART initiation and the criteria for initiation</b> |                                                                                                                                                       |                                                                                                                                                                                                                                                                                                                                                                                                                                                      |
|-------------------------------------------------------|-------------------------------------------------------------------------------------------------------------------------------------------------------|------------------------------------------------------------------------------------------------------------------------------------------------------------------------------------------------------------------------------------------------------------------------------------------------------------------------------------------------------------------------------------------------------------------------------------------------------|
| <b>Regimen</b>                                        | <b>Criteria</b>                                                                                                                                       | <b>ART</b>                                                                                                                                                                                                                                                                                                                                                                                                                                           |
| <b>1</b>                                              | 1. CD4 count is $\leq 350$<br>2. Viral load $< 400$<br>3. Stage 3 or 4 disease, pregnant or breastfeeding women regardless of CD4 count or viral load | Tenofovir (TDF), Lamivudine (3TC) and Efavirenz (EFV)<br>OR<br>Fixed Drug Combination (FDC) - Tenofovir/Emtricitabine/Efavirenz<br><br><b>NB:</b><br>1. Efavirenz (EFV) is replaced with Nevirapine (NVP) for patients with depression or psychosis.<br><br>2. Regimen 1 is replaced with Zidovudine (AZT) if pregnant with depression, psychosis, known kidney disease, disease, hypertension or $\geq 2+$ proteinuria and refer patient to doctor. |
| <b>2</b>                                              | Viral load $> 1000$ on two occasions                                                                                                                  | Lopinavir/ritonavir (LPV/r), Lamivudine (3TC) and AZT (if currently using TDF)<br>OR<br>TDF [if currently using AZT or Stavudine (d4T)]                                                                                                                                                                                                                                                                                                              |
| <b>Antihypertensive and adjuvant drugs</b>            |                                                                                                                                                       |                                                                                                                                                                                                                                                                                                                                                                                                                                                      |
| <b>1</b>                                              | The most commonly prescribed antihypertensive drugs                                                                                                   | Hydrochlorothiazide, Enalapril, Amlodipine and atenolol.                                                                                                                                                                                                                                                                                                                                                                                             |
| <b>2</b>                                              | Adjuvant drugs prescribed for hypertension patients                                                                                                   | Daily dose of simvastatin if the patient had Cardiovascular Disease (CVD) or a CVD risk $> 20\%$<br>Daily aspirin dose if patients had CVD and/or diabetes                                                                                                                                                                                                                                                                                           |

*\*Criteria for referral to doctor: abnormal blood results, poor adherence, TB symptoms depression or psychosis*
